# Supplementary material for: Excitonic interaction amongst InP/ZnS salt pellets
Source: Royal Society of Chemistry journal article supplement (doi:10.1039/c7tc01827d), 2017-01-01
Supplement: c7tc01827d1.pdf [file c7tc01827d1.pdf]

## Supplementary Information

### Excitonic interaction amongst InP/ZnS salt pellets†

*Yemliha Altıntaş<sup>a</sup>, Ahmet Faruk Yazıcı<sup>a</sup>, Miray Unlu<sup>a</sup>, Seyma Dadı<sup>a</sup>, Sinan Genç<sup>b</sup>, Evren Mutlugün<sup>b\*</sup>*

<sup>a</sup>Department of Materials Science and Nanotechnology, Abdullah Gül University, Kayseri, Turkey  
TR-38080.

<sup>b</sup> Department of Electrical-Electronics Engineering, Abdullah Gül University, Kayseri, Turkey  
TR-38080.

\*Corresponding author [evren.mutlugun@agu.edu.tr](mailto:evren.mutlugun@agu.edu.tr)

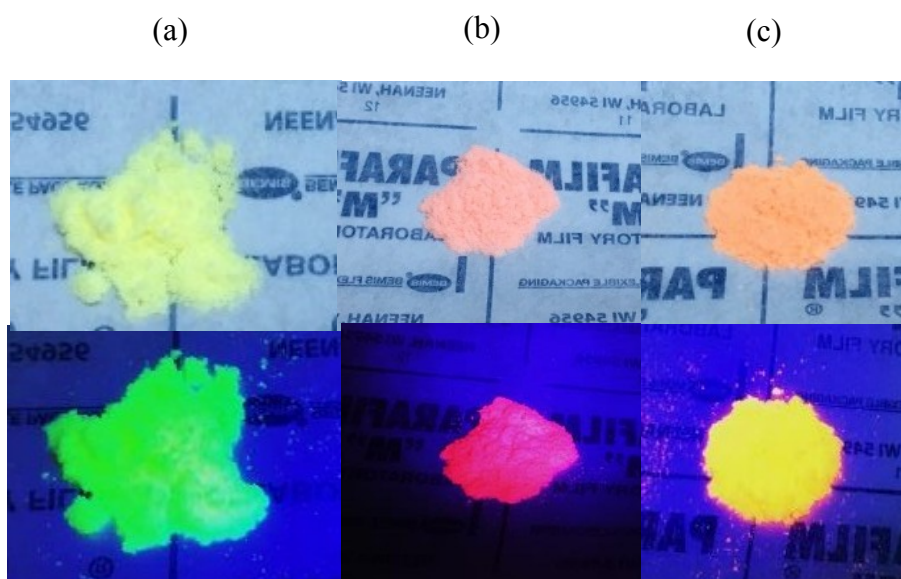

**Fig. S1** (a) Green (b) Red (c) Yellow emitting quantum dot salt powder without UV-illumination and under UV- illumination.

**Fig. S2** (a) Emission kinetics of R:G (0.25:0) and (0.25:1) concentration ratio, (b) Emission

kinetics of R:G (0.5:0) and (0.5:1) concentration ratio (c) Emission kinetics of R:G (1:0) and

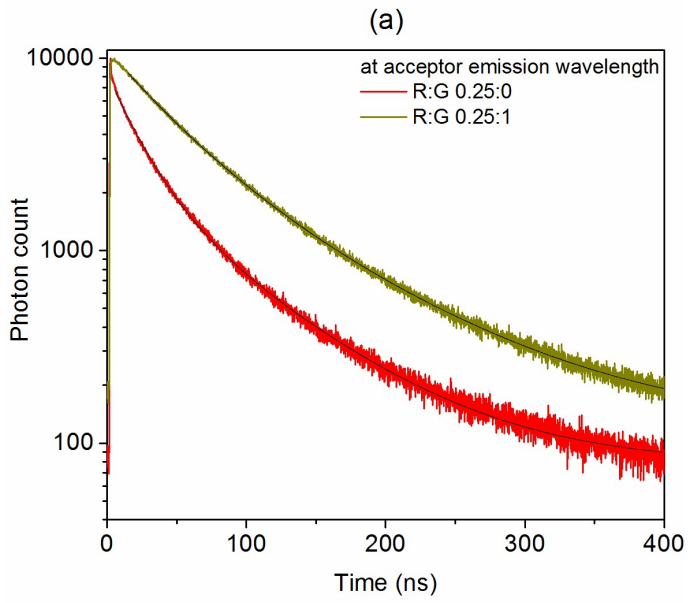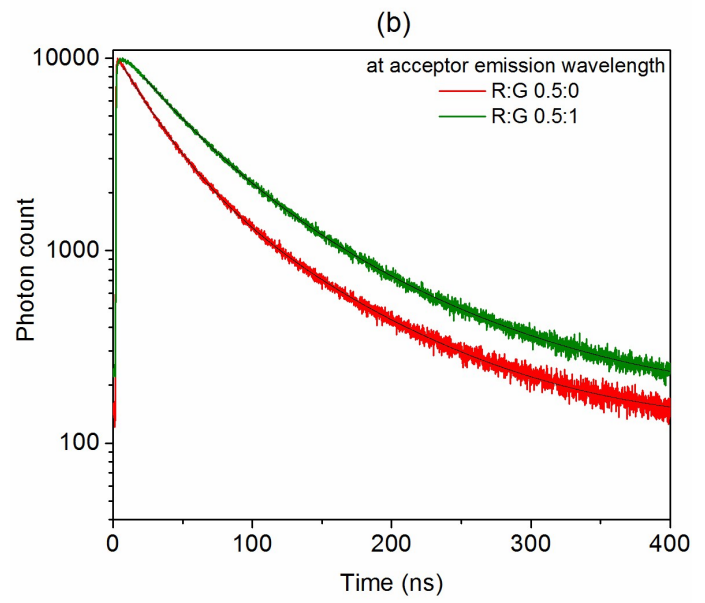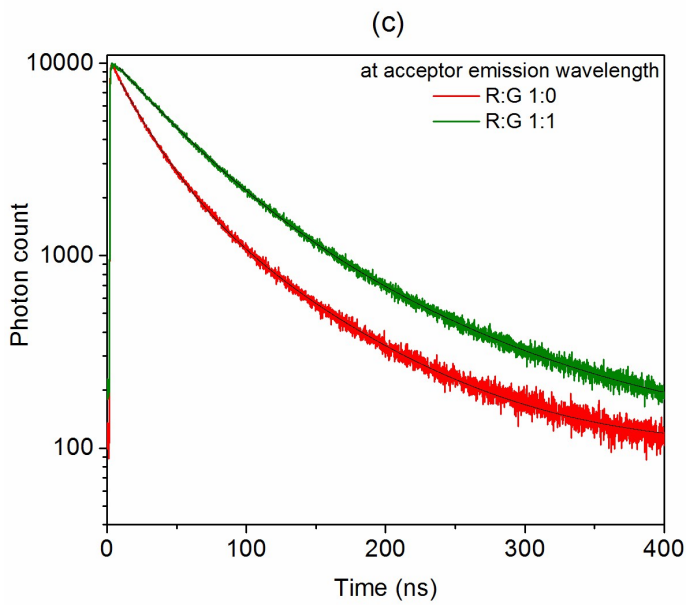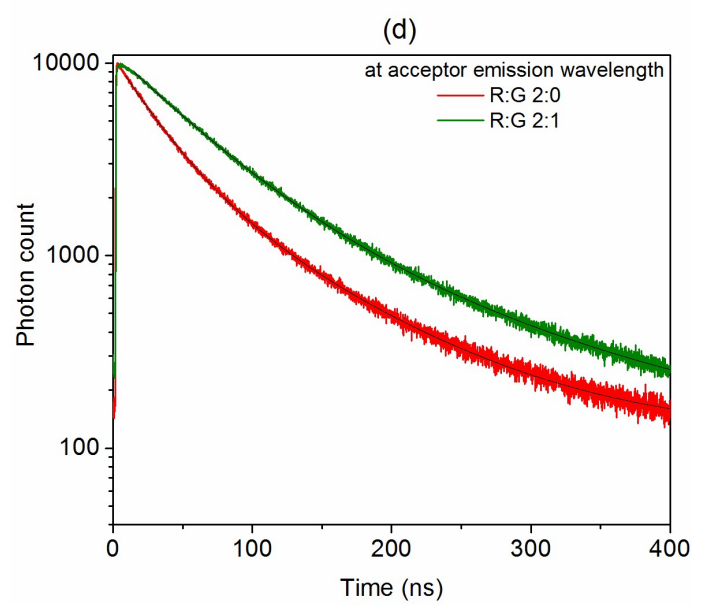

acceptor emission wavelength

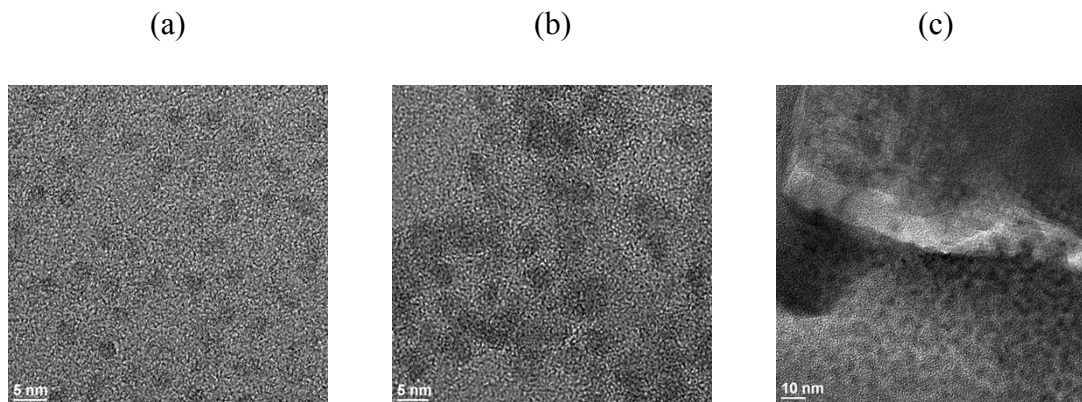

**Fig. S3** Transmission electron microscopy images of a) green b) red QDs and c) QD on KCl salt crystal

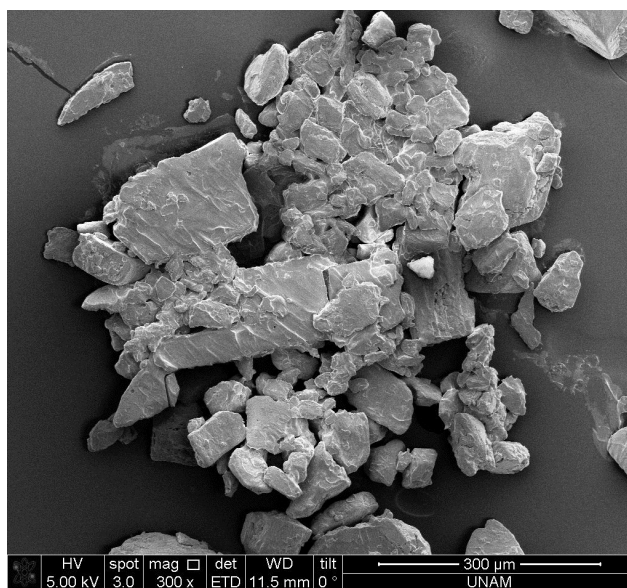

**Fig. S4** Scanning electron microscopy image of the salt before pelleting.

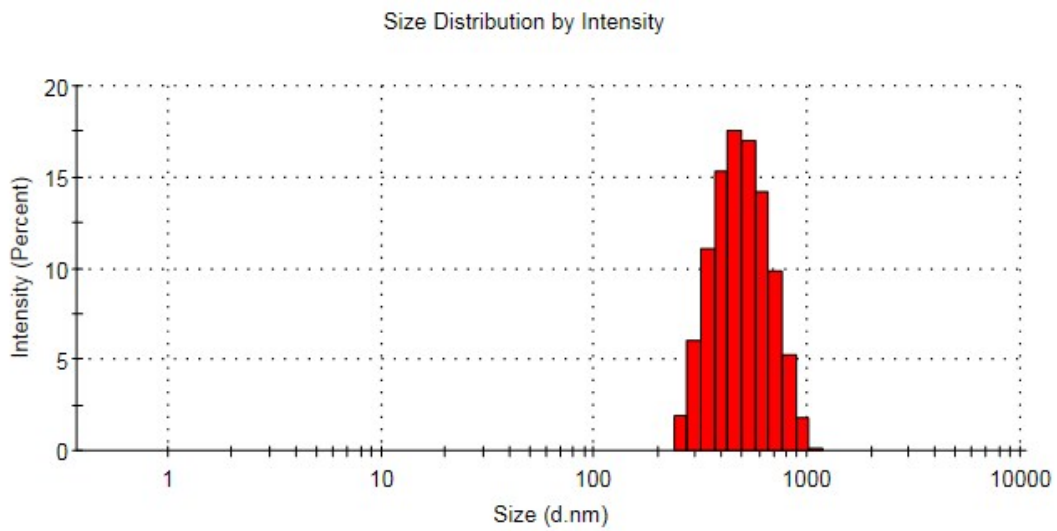

Average size of milled KCl salt powder : 511 nm

**Fig. S5** Dynamic light scattering measurement of the milled salt.
